# Supplementary material for: Do video game interventions improve motor outcomes in children with developmental coordination disorder? A systematic review using the ICF framework
Source: BMC Pediatr. 2019 Jan 16;19:22. doi: 10.1186/s12887-018-1381-7 (PMC6335818; doi:10.1186/s12887-018-1381-7)
Supplement: Supplementary file 1 — Search terms used for systematic database search. (PDF 112 kb) [file 12887_2018_1381_MOESM1_ESM.pdf]

**Additional file 1.** Search terms used for systematic database search.

| Search terms                          |                                                                                                                                                                                                                                            |
|---------------------------------------|--------------------------------------------------------------------------------------------------------------------------------------------------------------------------------------------------------------------------------------------|
| <b>Population</b>                     |                                                                                                                                                                                                                                            |
| Children                              | paediatric* OR pediatric* OR child* OR adolesc*                                                                                                                                                                                            |
| Neurodevelopmental conditions         | Developmental OR neurodevelopmental OR "cerebral palsy" OR "Down's syndrome" OR "Downs syndrome" OR "Down syndrome" OR preterm OR pre-term OR premature OR "muscular dystrophy" OR autism OR "spina bifida" OR "brain injur*"              |
| <b>Intervention</b>                   |                                                                                                                                                                                                                                            |
| Virtual reality                       | "virtual realit*" OR "virtual therap*" OR "virtual environment*" OR "video gam*" OR "active gam*" OR exergam* OR "computer gam*" OR "serious gam*" OR Wii OR Kinect OR PlayStation OR EyeToy OR GestureTek OR IREX                         |
| <b>Comparison</b>                     |                                                                                                                                                                                                                                            |
| N/A                                   |                                                                                                                                                                                                                                            |
| <b>Outcome</b>                        |                                                                                                                                                                                                                                            |
| Physical function or motor impairment | walk* OR balance OR equilibrium OR postur* OR "body sway" OR "lower limb" OR "lower extremit*" OR stand* OR step* OR ambulat* OR motor OR fitness OR "cardiovascular endurance" OR activit* OR exercis* OR sedentary OR locomot* OR energy |

Each domain searched independently, with domains combined using 'AND'. Relevant medical subject headings were also included in applicable databases. A variety of neurodevelopmental conditions were included to ensure a comprehensive search of the available literature was performed to identify any study that included children with developmental coordination disorder.
